# Supplementary material for: Potentially inappropriate medications related to two-year progression of mild cognitive impairment and dementia
Source: Research Square preprint supplement (doi:10.21203/rs.3.rs-6290335/v1), 2025-04-16
Supplement: Supplementary file 1 [file 86251306a00ebf477b8187e6.docx]

**Appendix 1:** List of PIMcogs and frequency of use (#) in 397 outpatients attending Norwegian memory clinics

| **Drug substance** | **ATC code** | **#** | **#** | **Drug substance** | **ATC code** | **#** | **#** | **Drug substance** | **ATC code** | **#** | **#** |
| --- | --- | --- | --- | --- | --- | --- | --- | --- | --- | --- | --- |
| **Anticholinergics** |  | **baseline** | **follow-up** | **Hypnotics/**  **benzodiazepines** |  | **baseline** | **follow-up** | **Antipsychotics** |  | **baseline** | **follow-up** |
| Solifenacin | A03BA01 | 0 | 0 | Zopiclone | N05CD08 | 0 | 0 | Perphenazine | N05AB03 | 0 | 0 |
| Amitriptyline | A03BA03 | 0 | 0 | Oxazepam | N05BA12 | 0 | 0 | Prochlorperazine | N05AB04 | 1 | 0 |
| Tolterodine | A03BB01 | 0 | 0 | Zolpidem | N05CM02 | 0 | 4 | Haloperidol | N05AD01 | 0 | 2 |
| Trospium | A04AD01 | 0 | 0 | Lorazepam | N05CM18 | 0 | 0 | Sertindole | N05AE03 | 0 | 0 |
| Fesoterodine | C01BA03 | 0 | 0 | Alprazolam | N05CF01 | 21 | 35 | Ziprasidone | N05AE04 | 0 | 0 |
| Levomepromazine | G04BD04 | 0 | 1 | Nitrazepam | N05BA04 | 9 | 17 | Lurasidone | N05AE05 | 0 | 0 |
| Olanzapine | G04BD07 | 4 | 2 | Diazepam | N05CF02 | 1 | 5 | Flupentixol | N05AF01 | 0 | 1 |
| Diazepam | G04BD08 | 9 | 9 | Melatonin | N05BA01 | 0 | 5 | Chlorprothixene | N05AF03 | 0 | 2 |
| Trimipramine | G04BD10 | 3 | 1 | Dexmedetomidine | N05CD02 | 0 | 1 | Zuclopenthixol | N05AF05 | 0 | 0 |
| Promethazine | G04BD11 | 3 | 0 | Flunitrazepam | N05BA06 | 0 | 0 | Olanzapine | N05AH03 | 2 | 6 |
| Prochlorperazine | N04AA02 | 0 | 0 |  |  |  |  | Quetiapine | N05AH04 | 3 | 8 |
| Doxepin | N05AB03 | 0 | 0 |  |  |  |  | Amisulpride | N05AL05 | 0 | 0 |
| Atropine | N05AB04 | 1 | 0 |  |  |  |  | Lithium | N05AN01 | 2 | 1 |
| Hyoscine butylbromide | N05AF03 | 0 | 2 |  |  |  |  | Risperidone | N05AX08 | 3 | 11 |
| Dicycloverine | N05AH02 | 0 | 0 |  |  |  |  | Aripiprazole | N05AX12 | 1 | 1 |
| Oxybutynin | N05AH03 | 2 | 6 |  |  |  |  | Paliperidone | N05AX13 | 0 | 0 |
| Chlorprothixene | N05BB01 | 1 | 3 |  |  |  |  | Cariprazine | N05AX15 | 0 | 0 |
| Alimemazine | N05AA02 | 3 | 1 |  |  |  |  | Brexpiprazole | N05AX16 | 0 | 0 |
| Cetirizine | N06AB05 | 0 | 0 |  |  |  |  | Levomepromazine | N05AA02 | 3 | 1 |
| Ondansetron | N06AA04 | 0 | 0 |  |  |  |  |  |  |  |  |
| Amiodarone | N06AA06 | 1 | 1 |  |  |  |  |  |  |  |  |
| Biperiden | N06AA09 | 6 | 4 |  |  |  |  |  |  |  |  |
| Perphenazine | N06AA10 | 0 | 0 |  |  |  |
| Clozapine | N06AA12 | 1 | 0 |  |  |  |
| Escitalopram | R06AB02 | 0 | 0 |  |  |  |
| Clomipramine | R06AD01 | 1 | 4 |  |  |  |
| Nortriptyline | R06AD02 | 0 | 1 |  |  |  |
| Chlorphenamine | R06AE03 | 0 | 0 |  |  |  |
| Loratadine | R06AE05 | 0 | 1 |  |  |  |
| Diphenhydramine | R06AA02 | 0 | 0 |  |  |  |
| Clemastine | R06AA09 | 0 | 0 |  |  |  |
